# Supplementary material for: Germination and Simulated Gastrointestinal Digestion of Chickpea (Cicer arietinum L.) in Exhibiting In Vitro Antioxidant Activity in Gastrointestinal Epithelial Cells
Source: MDPI journal article supplement (doi:10.3390/antiox12051114), 2023-05-18

Germination and Simulated Gastrointestinal Digestion of Chickpea (*Cicer arietinum* L.) in Exhibiting *in-vitro* Antioxidant Activity in Gastrointestinal Epithelial Cells

Ashley Newton<sup>a</sup>, Kaustav Majumder<sup>a#</sup>

<sup>a</sup>Department of Food Science and Technology, University of Nebraska-Lincoln, Lincoln, NE 68588 USA

**# Address for correspondence:**

Dr. Kaustav Majumder

256 Food Innovation Center, Nebraska Innovation Campus, Department of Food Science and Technology, University of Nebraska-Lincoln, Lincoln, NE, USA, 68588-6205

Telephone: (402)-472-3510; Fax: (402) 472-4474; Email: [kaustav.majumder@unl.edu](mailto:kaustav.majumder@unl.edu)

## Supplementary Data

**Table S1.** Concentration of free amino acids identified in D0-CD or D3-CD samples.

| Amino Acid                 | Day 0 (µg/g sample) <sup>a</sup> | Day 3 (µg/g sample) <sup>a</sup> |
|----------------------------|----------------------------------|----------------------------------|
| Histidine (His)            | 101.3 ± 17.4                     | 102.2 ± 2.1                      |
| Asparagine (Asn)           | 103.6 ± 6.1                      | 108.4 ± 20.5                     |
| Taurine                    | 50.7 ± 5.7                       | 43.9 ± 3.1                       |
| Serine (Ser)               | 80.9 ± 1.6                       | 76.1 ± 7.0                       |
| Glutamine (Gln)            | 163.0 ± 18.8                     | 178.5 ± 8.5                      |
| Arginine (Arg)             | 639.4 ± 41.6                     | 565.9 ± 21.7                     |
| Aspartic acid (Asp)        | 30.9 ± 10.3                      | 38.7 ± 2.1                       |
| Glutamic acid (Glu)        | 105.8 ± 34.9                     | 141.0 ± 7.0                      |
| Threonine (Thr)            | 88.2 ± 8.0                       | 97.0 ± 7.0                       |
| Alanine (Ala)              | 77.9 ± 11.2                      | 90.5 ± 6.8                       |
| γ-aminobutyric acid (GABA) | 14.9 ± 2.3                       | 21.0 ± 10.6                      |
| Proline (Pro)              | 16.5 ± 16.5                      | 20.2 ± 5.6                       |
| Ornithine                  | 8.9 ± 0.7                        | 9.3 ± 0.6                        |
| Lysine (Lys)               | 136.6 ± 30.1                     | 182.4 ± 4.9                      |
| Tyrosine (Tyr)             | 459.1 ± 57.0                     | 404.4 ± 27.5                     |
| Methionine (Met)           | 80.5 ± 13.3                      | 81.2 ± 5.8                       |
| Valine (Val)               | 118.2 ± 17.5                     | 143.3 ± 17.4                     |
| Isoleucine (Ile)           | 126.8 ± 21.7                     | 133.0 ± 13.4                     |
| Leucine (Leu)              | 422.9 ± 41.9                     | 417.3 ± 23.6                     |
| Phenylalanine (Phe)        | 746.8 ± 106.0                    | 675.0 ± 59.8                     |
| Tryptophan (Trp)           | 292.4 ± 22.1                     | 243.0 ± 22.1                     |

<sup>a</sup>Mean ± Standard deviation, SD

**Table S2.** Total list of identified di- and tripeptides in GCD and their intensity, *m/z*, and retention time (min).

| <b>Amino Acid Sequence</b> | <b>Intensity of Day 0<sup>a</sup></b> | <b>Intensity of Day 3<sup>a</sup></b> | <b><i>m/z</i></b> | <b>Retention time (min)</b> |
|----------------------------|---------------------------------------|---------------------------------------|-------------------|-----------------------------|
| Gly-Asp*                   | 97425 ± 4695                          | 111485 ± 4916                         | 191.0663          | 11.20                       |
| Pro-Asn*                   | 106562 ± 1486                         | 111854 ± 2849                         | 230.1136          | 10.88                       |
| Phe-Glu*                   | 679836 ± 53410                        | 785339 ± 20354                        | 295.1287          | 9.28                        |
| Glu-Phe*                   | 29336070 ± 3758664                    | 17116700 ± 2315890                    | 295.1287          | 8.24                        |
| Glu-Tyr*                   | 5224094 ± 659015                      | 2956915 ± 564178                      | 311.1237          | 8.83                        |
| Leu-Gln*                   | 5533495 ± 405590                      | 6640445 ± 448054                      | 260.1602          | 3.06                        |
| Ile-Lys                    | 6613469 ± 208469                      | 6295463 ± 199190                      | 260.1968          | 13.77                       |
| His-Ile                    | 2797239 ± 259379                      | 3190615 ± 194620                      | 269.1607          | 13.01                       |
| Leu-Val                    | 2493872 ± 337728                      | 3122554 ± 335509                      | 231.1704          | 8.41                        |
| Gly-Ile                    | 718685 ± 514374                       | 626875 ± 426295                       | 189.1231          | 2.02                        |
| Val-Pro                    | 17731 ± 4718                          | 18320 ± 3865                          | 215.1388          | 1.11                        |
| Pro-Thr                    | 9518 ± 258                            | 9097 ± 1078                           | 217.118           | 4.63                        |
| Thr-Pro                    | 198428 ± 27646                        | 223864 ± 19950                        | 217.1181          | 1.19                        |
| Ser-Ile                    | 3692212 ± 582584                      | 4464304 ± 186343                      | 219.1337          | 2.90                        |
| His-Ala                    | 9801 ± 3430                           | 13737 ± 2025                          | 227.1136          | 2.18                        |
| Pyro-Glu-Val               | 650423 ± 215264                       | 636029 ± 42276                        | 229.1181          | 3.55                        |
| Pro-Ile                    | 1275105 ± 386268                      | 1280836 ± 194307                      | 229.1545          | 4.03                        |
| Pro-Leu                    | 1816590 ± 186541                      | 1947339 ± 202747                      | 229.1545          | 5.03                        |
| Ile-Pro                    | 932919 ± 170656                       | 1002200 ± 114319                      | 229.1545          | 4.57                        |
| Val-Asn                    | 23910 ± 5316                          | 23663 ± 7887                          | 232.1291          | 1.11                        |
| Leu-Thr                    | 1762084 ± 85786                       | 1855138 ± 182021                      | 233.1493          | 1.34                        |
| Thr-Ile                    | 3647724 ± 702508                      | 3608798 ± 522722                      | 233.1493          | 1.47                        |
| Thr-Leu                    | 2415069 ± 637787                      | 2436889 ± 248587                      | 233.1494          | 4.05                        |
| Leu-Thr                    | 4484573 ± 571367                      | 5000543 ± 347108                      | 233.1494          | 3.48                        |

|         |                      |                      |          |      |
|---------|----------------------|----------------------|----------|------|
| Pro-Gln | 238646 ±<br>22087    | 241190 ±<br>25987    | 244.1289 | 1.10 |
| Lys-Pro | 157171 ± 7555        | 143369 ±<br>12206    | 244.1653 | 2.47 |
| Val-Gln | 3716505 ±<br>1541414 | 3772113 ±<br>348699  | 246.1445 | 1.38 |
| Asn-Ile | 5027853 ±<br>424619  | 4996072 ±<br>12448   | 246.1445 | 2.95 |
| Leu-Asn | 1599642 ±<br>248726  | 1637590 ±<br>67621   | 246.1445 | 4.45 |
| Pro-Met | 332120 ±<br>60924    | 379891 ±<br>48075    | 247.1107 | 2.15 |
| Val-Glu | 1391518 ±<br>135085  | 1488358 ±<br>126037  | 247.1285 | 1.10 |
| Glu-Val | 415136 ±<br>47257    | 423218 ±<br>72978    | 247.1286 | 3.01 |
| Ala-Thr | 3764302 ±<br>1046497 | 4412648 ±<br>995316  | 253.1179 | 1.54 |
| Pro-His | 410938 ±<br>98140    | 415774 ±<br>72899    | 253.1291 | 4.80 |
| His-Pro | 175208 ±<br>45701    | 117403 ±<br>16317    | 253.1292 | 5.24 |
| Val-His | 13216 ± 1697         | 12613 ± 726          | 255.1448 | 4.60 |
| Ile-Gln | 671523 ±<br>196324   | 832165 ±<br>58945    | 260.1601 | 2.90 |
| Leu-Lys | 60711 ± 31898        | 57102 ± 7897         | 260.1965 | 3.47 |
| Ile-Glu | 4783146 ±<br>1435818 | 4580444 ±<br>1098873 | 261.144  | 1.67 |
| Leu-Glu | 6907591 ±<br>2010787 | 6475984 ±<br>3171277 | 261.1441 | 1.91 |
| Leu-Met | 4343096 ±<br>1228530 | 3514074 ±<br>259780  | 263.1413 | 5.28 |
| Ile-Met | 737579 ±<br>19057    | 721880 ±<br>109741   | 263.1421 | 5.03 |
| Met-Asp | 983531 ±<br>61254    | 891863 ±<br>109618   | 265.0848 | 1.77 |
| Val-Phe | 3148325 ±<br>1146242 | 3013906 ±<br>958873  | 265.1542 | 5.82 |
| Phe-Thr | 2618308 ±<br>444500  | 2786107 ±<br>672455  | 267.1335 | 2.65 |
| His-Leu | 6207 ± 992           | 7632 ± 1423          | 269.1604 | 5.87 |
| Pro-Arg | 388767 ±<br>54629    | 397463 ±<br>91425    | 272.1711 | 1.98 |
| Met-Glu | 435845 ±<br>42234    | 492743 ±<br>53947    | 279.1004 | 3.12 |
| Phe-Ile | 2022973 ±<br>522869  | 2603421 ±<br>524421  | 279.1698 | 6.34 |
| Val-Tyr | 2102615 ±<br>52896   | 2258202 ±<br>49527   | 281.149  | 4.10 |

|              |                  |                  |          |       |
|--------------|------------------|------------------|----------|-------|
| Thr-Tyr      | 753198 ± 671834  | 877375 ± 176931  | 283.1283 | 2.33  |
| Arg-Asp      | 54936 ± 7725     | 60174 ± 10490    | 290.1456 | 2.77  |
| Leu-Tyr      | 684543 ± 203764  | 825368 ± 214007  | 295.1647 | 5.13  |
| Asp-Tyr      | 273843 ± 64119   | 250450 ± 79963   | 297.1075 | 1.28  |
| Thr-Trp      | 846861 ± 87264   | 757935 ± 100896  | 306.1444 | 4.37  |
| His-Arg      | 2272586 ± 190563 | 2153663 ± 805265 | 312.1788 | 6.28  |
| Trp-Gln      | 24031 ± 2793     | 26616 ± 5917     | 333.1533 | 5.40  |
| Trp-Tyr      | 17347 ± 1905     | 20516 ± 4933     | 368.1601 | 6.32  |
| Lys-Lys      | 60601 ± 20445    | 31045 ± 28521    | 587.366  | 15.36 |
| Pro-Val-Lys* | 237606 ± 15679   | 203066 ± 9756    | 343.2339 | 14.03 |
| Asp-Lys-Lys* | 152507 ± 17243   | 113261 ± 7917    | 390.2344 | 14.59 |
| Ala-His-Arg* | 158056 ± 13144   | 81683 ± 9221     | 383.2161 | 5.74  |
| His-Ala-Lys  | 0                | 7991 ± 5181      | 355.2089 | 8.82  |
| Val-Asp-Lys  | 275892 ± 78458   | 264556 ± 51432   | 361.2075 | 3.87  |
| Pro-Pro-Arg  | 2982264 ± 173313 | 2739620 ± 682047 | 369.2238 | 5.01  |
| Glu-Thr-Lys  | 53625 ± 11932    | 62424 ± 4723     | 377.2023 | 2.20  |
| Thr-Glu-Lys  | 152836 ± 83893   | 156875 ± 29859   | 377.2026 | 3.77  |
| Glu-Asn-Lys  | 361196 ± 66697   | 301114 ± 59688   | 390.1977 | 2.31  |
| Asp-Glu-Lys  | 1539307 ± 255520 | 1432982 ± 140763 | 391.1815 | 1.49  |
| Glu-Val-Phe  | 63616 ± 6183     | 88778 ± 17801    | 394.1968 | 5.94  |
| Asp-Phe-Arg  | 418531 ± 191666  | 174332 ± 44235   | 437.2137 | 5.26  |
| Phe-Asp-Arg  | 184426 ± 93698   | 217169 ± 24236   | 437.2138 | 2.87  |
| Pro-Phe-Arg  | 37180 ± 1383     | 24514 ± 6964     | 837.4721 | 7.55  |

<sup>a</sup>Mean ± standard deviation (SD)

\*Peptide intensity is significantly different ( $p < 0.05$ ) from D0-CD or D3-CD samples.

**Figure S1.** Peptides identified in D0-CD and D3-CD samples.

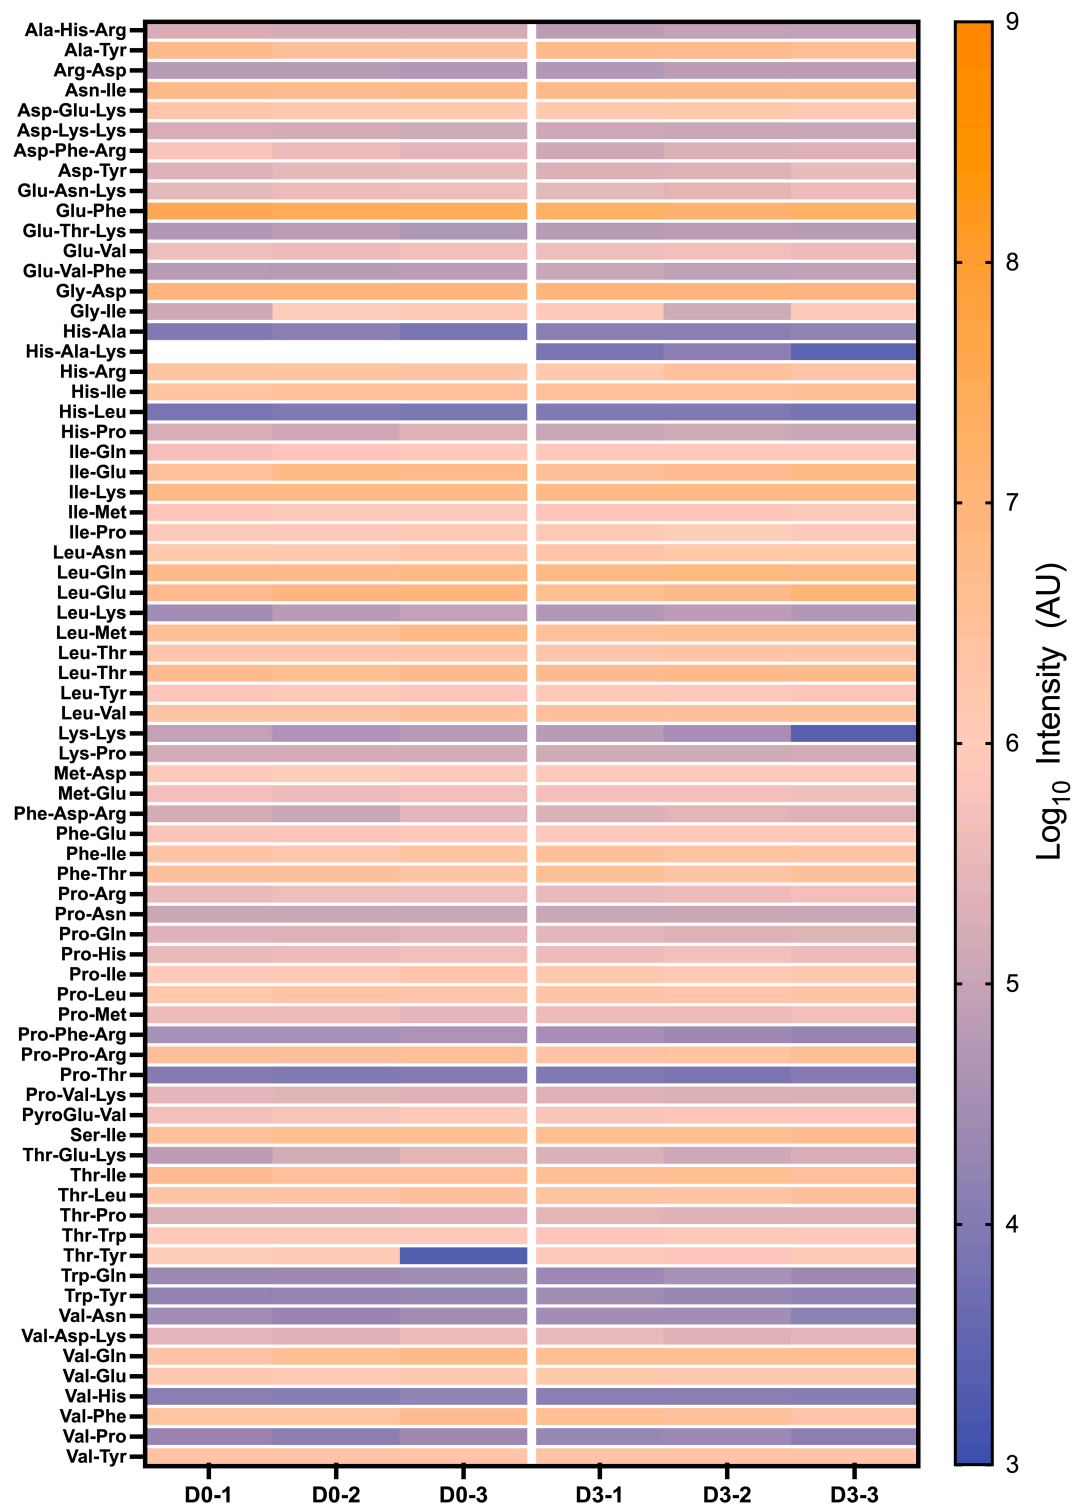

Supplement: s1 [file s1]
